# Supplementary material for: Wet chemical synthesis and magnetic properties of core–shell nanocolumns of Ni(OH)2@Co(OH)2 and their oxides
Source: Royal Society of Chemistry journal article supplement (doi:10.1039/c0ce00836b), 2011-01-01
Supplement: c0ce00836b.pdf [file c0ce00836b.pdf]

## Supporting Information

### Wet chemical Synthesis and magnetic properties of core-shell nanocolumns of $\text{Ni}(\text{OH})_2@ \text{Co}(\text{OH})_2$ and their oxides

Meng Yao<sup>a</sup>, Weimeng Chen<sup>b</sup>, Xia Fan<sup>a</sup>, Xiangmin Meng<sup>c</sup>, Lin Guo<sup>\*a</sup> and Chinping Chen<sup>\*b</sup>

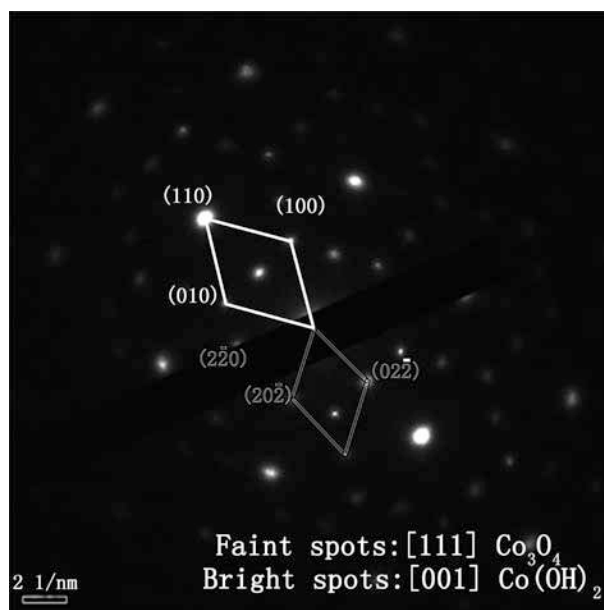

**Figure S1.** SAED image of the edge of as-prepared  $\text{Ni}(\text{OH})_2@ \text{Co}(\text{OH})_2$  nanocolumns after long time irradiating. The image shows two sets of diffraction patterns, which represents two sets of crystal structures. The bright one belongs to  $\text{Co}(\text{OH})_2$  along the  $[001]$  direction, and another were due to  $\text{Co}_3\text{O}_4$  along the  $[111]$  direction.

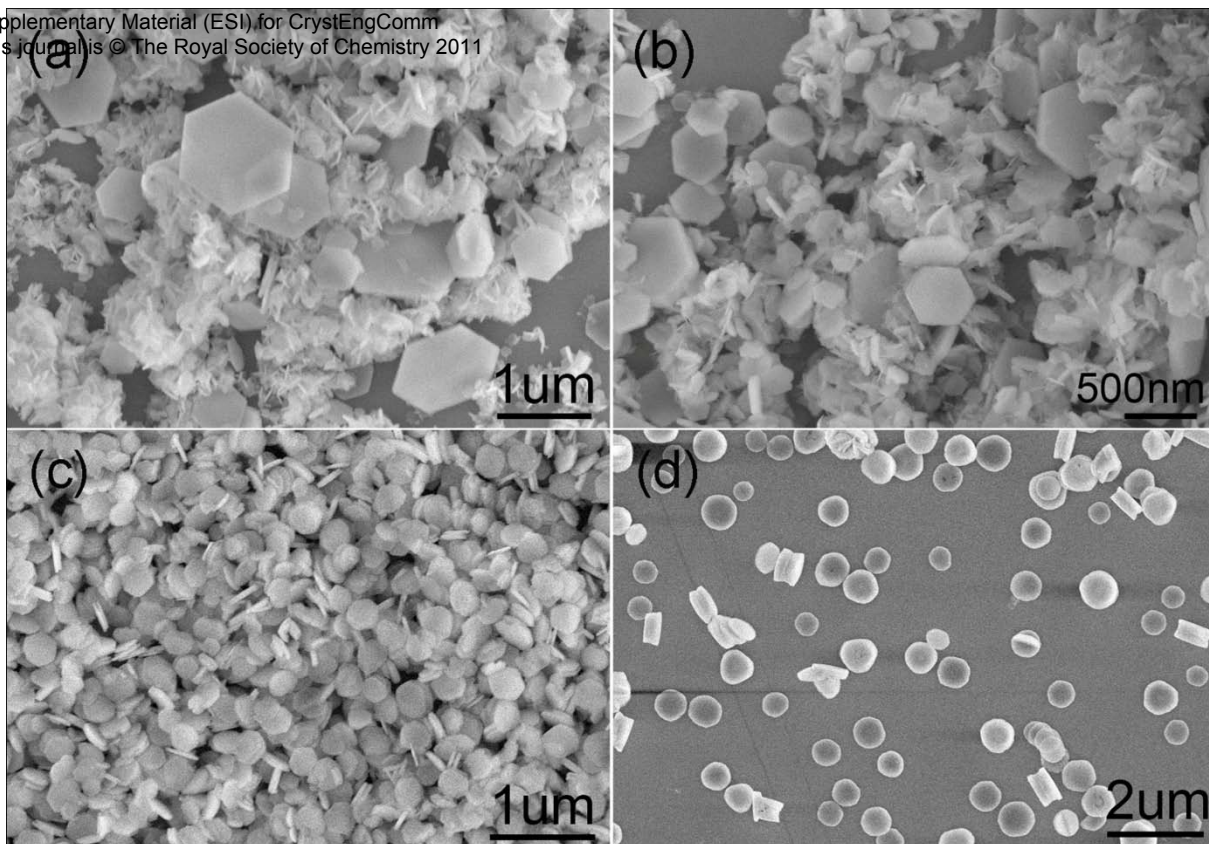

**Figure S2.** SEM images of the as-prepared samples with the different initial amount of  $\text{N}_2\text{H}_4 \cdot \text{H}_2\text{O}$ . (a) 0.1 mL; (b) 0.25 mL; (c) 0.5 mL; (d) 3 mL.

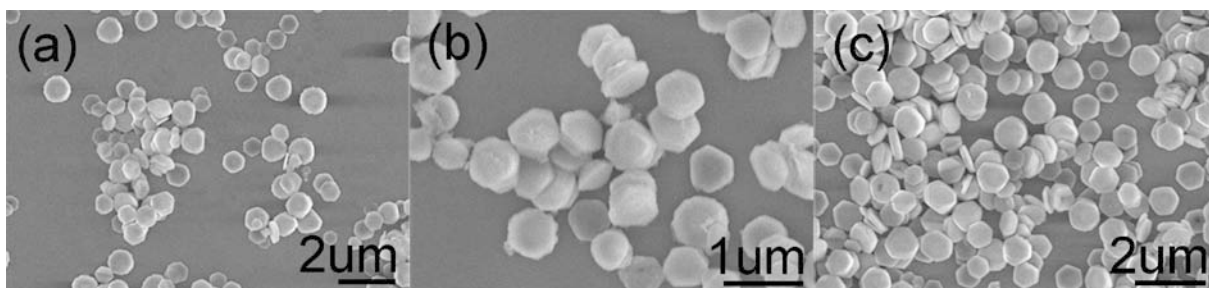

**Figure S3.** SEM images of the as-prepared samples with the different amount of  $\text{N}_2\text{H}_4 \cdot \text{H}_2\text{O}$  after adding  $\text{CoCl}_2$ : (a) 3 mL (c) 4 mL (d) 5 mL.

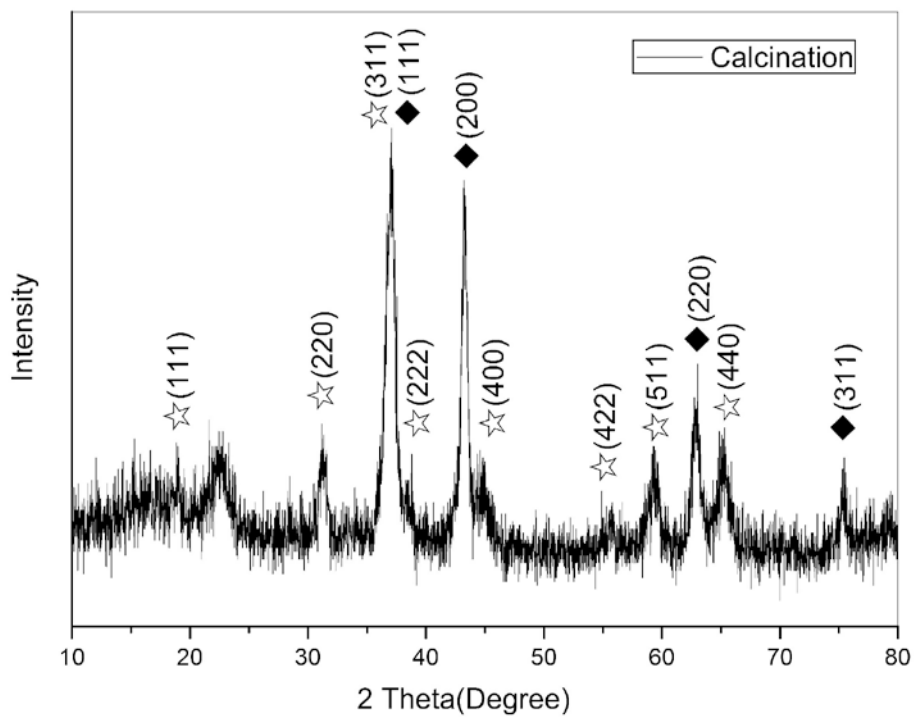

**Figure S4.** XRD image of the calcination. The diffraction peaks, marked with pentacles, can be indexed to the pure fcc  $\text{Co}_3\text{O}_4$  (JCPDS No. 42-1467), and those marked with diamonds can be indexed to the pure fcc  $\text{NiO}$  (JCPDS No. 47-1049).
